# Supplementary material
Source: PubMed Central journal article supplement (PMC6138546)
Supplement: NIHMS969862-supplement-Supplemental_Data_File___doc___tif__pdf__etc___1.pdf [file NIHMS969862-supplement-Supplemental_Data_File___doc___tif__pdf__etc___1.pdf]

### Supplemental Digital Content 3

**Table 1.** STD and PD AUC and iAUC for responses for glucose, insulin and FFA

|                | AUC           |              |      | iAUC             |                  |      |
|----------------|---------------|--------------|------|------------------|------------------|------|
|                | STD           | PED          | p    | STD              | PED              | p    |
|                | Mean (SE)     | Mean (SE)    |      | Mean (SE)        | Mean (SE)        |      |
| <b>Glucose</b> | 1122.0 (55.0) | 1118 (45.1)  | 0.87 | 126.3 (38.9)     | 95.4 (45.6)      | 0.32 |
| <b>Insulin</b> | 441.8 (56.1)  | 302.6 (41.8) | 0.00 | 358.8 (48.5)     | 213.6 (33.6)     | 0.00 |
| <b>FFA</b>     | 14.8 (3.8)    | 12.9 (2.4)   | 0.29 | -7732.3 (3233.8) | -8863.2 (4241.0) | 0.59 |

AUC: area under the curve; FFA: free fatty acid; iAUC: incremental area under the curve; PED: pedal desk; SE: standard error; STD: standard desk
