# Supplementary material
Source: PubMed Central journal article supplement (PMC6138546)
Supplement: NIHMS969862-supplement-Supplemental_Data_File___doc___tif__pdf__etc___2.pdf [file NIHMS969862-supplement-Supplemental_Data_File___doc___tif__pdf__etc___2.pdf]

## Supplemental Digital Content 4

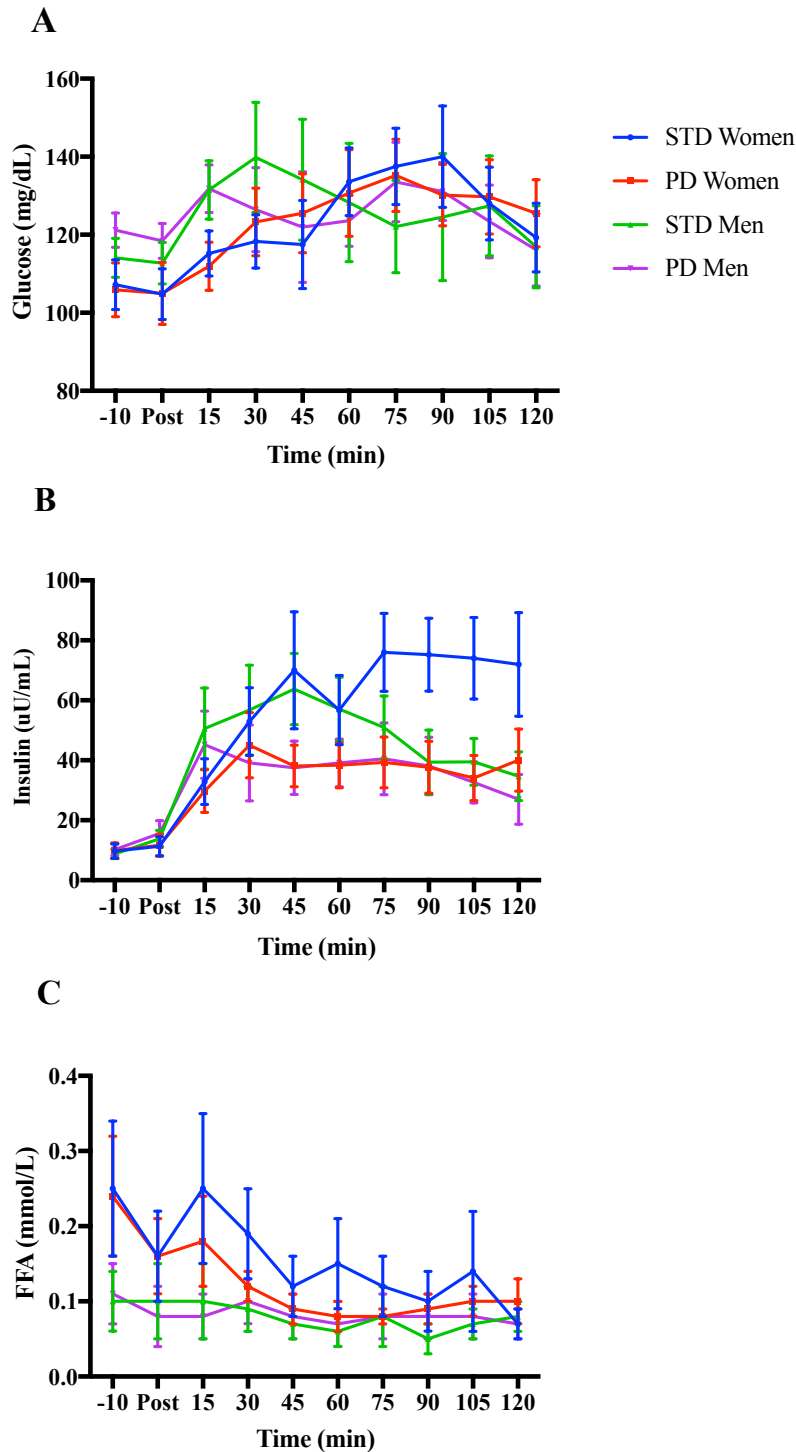

**Figure 1.** Sex-dependent effects of PD and STD conditions on postprandial blood glucose concentration (A); postprandial blood insulin concentration (B); postprandial blood free fatty acid concentrations (C). Data are presented as means  $\pm$  standard error of the mean. PD = pedal desk; STD = standard desk.
