# Supplementary material
Source: PubMed Central journal article supplement (PMC6138546)

Supplementary Digital Content Figure 1:  
Prototype Pedal Desk: The dimensions allow the device to be placed in routine work environments without special space requirements.

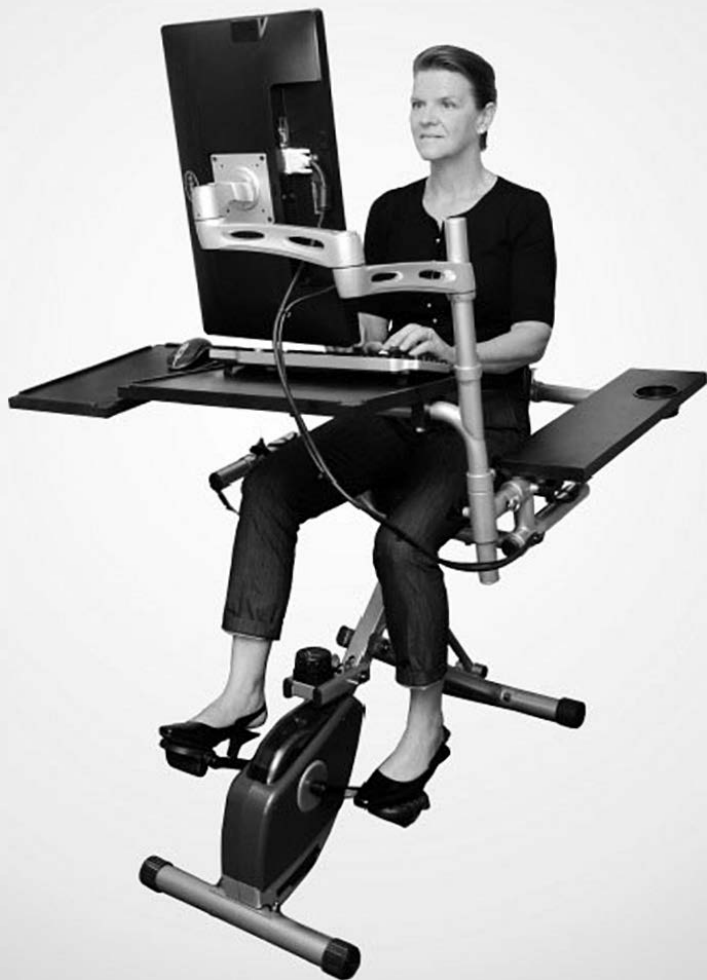

Supplement: NIHMS969862-supplement-Supplemental_Data_File___doc___tif__pdf__etc___3.pdf [file NIHMS969862-supplement-Supplemental_Data_File___doc___tif__pdf__etc___3.pdf]
